# Supplementary material for: Phenotypic Classification of Eye Colour and Developmental Validation of the Irisplex System on Population Living in Malakand Division, Pakistan
Source: MDPI journal article supplement (doi:10.3390/biomedicines11041228), 2023-04-20
Supplement: s1 [file s1]

**Supplementary Materials:**

Table S 1: SNPs Genotype Profiles

| Sample | rs12913832 | rs1800407 | rs12896399 | rs16891982 | rs1393350 | rs12203592 |
|--------|------------|-----------|------------|------------|-----------|------------|
| DNA1   | CT         | GG        | CC         | GC         | GG        | CC         |
| DNA2   | TT         | GA        | AA         | GC         | GG        | CC         |
| DNA3   | CT         | GG        | AA         | GC         | AA        | CC         |
| DNA4   | TT         | GG        | CA         | CC         | GA        | CC         |
| DNA5   | CC         | GG        | CC         | GG         | GG        | CC         |
| DNA6   | TT         | GA        | CA         | CC         | GG        | CC         |
| DNA7   | CC         | GG        | CA         | GC         | GG        | CC         |
| DNA8   | CC         | GG        | CC         | GC         | GG        | CC         |
| DNA9   | CC         | GG        | CC         | GC         | GG        | CC         |
| DNA10  | TT         | GG        | CA         | GG         | GG        | CC         |
| DNA11  | CC         | GG        | AA         | CC         | GA        | CC         |
| DNA12  | CC         | GG        | CA         | CC         | GG        | CC         |
| DNA13  | CC         | GG        | CA         | CC         | GG        | CC         |
| DNA14  | TT         | GG        | CC         | GG         | GG        | CC         |
| DNA15  | CC         | GG        | CA         | CC         | GG        | CC         |
| DNA16  | CC         | GG        | AA         | GC         | GG        | CC         |
| DNA17  | CC         | GG        | CC         | GC         | GG        | CC         |
| DNA18  | TT         | GG        | CA         | GG         | GG        | CC         |
| DNA19  | CC         | GG        | CC         | GG         | GG        | CC         |
| DNA20  | CC         | GG        | CC         | GC         | GG        | CC         |
| DNA21  | TT         | GG        | CC         | GG         | GG        | CC         |
| DNA22  | CT         | GG        | CA         | GG         | GG        | CC         |
| DNA23  | CT         | GG        | CA         | GC         | GG        | CC         |
| DNA24  | TT         | GA        | CC         | GG         | GG        | CC         |
| DNA25  | TT         | GG        | CA         | GC         | GG        | CC         |
| DNA26  | TT         | GG        | CA         | GG         | GG        | CC         |
| DNA27  | CC         | GG        | CC         | GG         | GG        | CC         |
| DNA28  | CT         | GG        | CC         | GC         | GA        | CC         |
| DNA29  | TT         | GG        | CC         | GG         | GA        | CC         |
| DNA30  | TT         | GG        | CC         | GG         | GG        | CC         |
| DNA31  | CT         | GG        | CC         | GG         | GG        | CC         |
| DNA32  | CT         | GG        | CC         | GG         | GG        | CC         |
| DNA33  | CT         | GG        | CA         | GC         | GG        | CC         |
| DNA34  | CT         | GG        | CA         | GG         | GG        | CC         |

|       |    |    |    |    |    |    |
|-------|----|----|----|----|----|----|
| DNA35 | CT | GG | CC | GG | GG | CC |
| DNA36 | CT | GG | CC | GG | GG | CC |
| DNA37 | CT | GG | CC | GG | GG | CC |
| DNA38 | CT | GG | CC | GC | GG | CC |
| DNA39 | CT | GG | CA | GG | GG | CC |
| DNA40 | CT | GG | CC | GC | GG | CC |
| DNA41 | TT | GA | CC | GG | GA | CC |
| DNA42 | CT | GG | CC | GG | GG | CC |
| DNA43 | TT | GG | CA | GG | GG | CC |
| DNA44 | TT | GG | CC | GG | GG | CC |
| DNA45 | CT | GG | AA | GG | GG | CC |
| DNA46 | CC | GG | CC | GG | GG | CC |
| DNA47 | CT | GA | CC | GC | GG | CC |
| DNA48 | CT | GG | CC | GC | GA | CC |
| DNA49 | CT | GG | CC | GC | GG | CC |
| DNA50 | TT | GG | CA | GC | GA | CC |
| DNA51 | CT | GG | CA | GG | GG | CC |
| DNA52 | CT | GA | CC | GC | GG | CC |
| DNA53 | TT | GG | CC | GG | GG | CC |
| DNA54 | CT | GA | CC | GC | GA | CC |
| DNA55 | TT | GG | CA | GG | GG | CC |
| DNA56 | CT | GG | CA | GG | GG | CC |
| DNA57 | TT | GA | CA | GG | GG | CC |
| DNA58 | CT | GG | CA | GG | GG | CC |
| DNA59 | 0  | 0  | 0  | 0  | 0  | 0  |
| DNA60 | CT | GG | CC | GG | GG | CC |
| DNA61 | CT | GG | CA | GC | GG | CC |
| DNA62 | TT | GA | CC | GG | GG | CC |
| DNA63 | CT | GG | CA | GC | GG | CT |
| DNA64 | CT | GG | CC | CC | GG | CC |
| DNA65 | CT | GA | CA | CC | GG | CC |
| DNA66 | CT | GA | CC | CC | GG | CC |
| DNA67 | TT | GA | CC | CC | GG | CC |
| DNA68 | CT | GG | CC | GG | GG | CC |
| DNA69 | TT | GA | CA | GC | GG | CC |
| DNA70 | CC | GG | CC | GG | GG | CC |
| DNA71 | TT | GA | CA | GG | GA | CC |
| DNA72 | TT | GG | CC | GG | GG | CC |

|        |    |    |    |    |    |    |
|--------|----|----|----|----|----|----|
| DNA73  | CT | GG | CC | GG | GG | CC |
| DNA74  | TT | GG | CC | GC | GG | CC |
| DNA75  | CT | GG | CA | CC | GG | CC |
| DNA76  | CT | GG | CC | GC | GG | CC |
| DNA77  | TT | GG | CC | GG | GG | CC |
| DNA78  | CT | GG | CC | GG | GG | CC |
| DNA79  | CT | GG | CC | GG | GG | CC |
| DNA80  | CT | GG | CC | CC | GG | CC |
| DNA81  | TT | GG | CC | GG | GG | CC |
| DNA82  | TT | GG | CC | GG | GG | CC |
| DNA83  | CT | GG | CC | GG | GG | CC |
| DNA84  | CC | GG | CC | GC | GG | CC |
| DNA85  | CT | GG | CC | GG | GG | CC |
| DNA86  | CT | GG | AA | GC | AA | CC |
| DNA87  | TT | GG | CC | GG | GG | CC |
| DNA88  | CT | GG | AA | GC | AA | CC |
| DNA89  | CC | GG | CC | GG | GG | CC |
| DNA90  | CT | GG | AA | GC | AA | CC |
| DNA91  | CT | GG | CC | GG | GG | CC |
| DNA92  | CT | GG | CC | GG | GG | CC |
| DNA93  | TT | GG | CC | GG | GG | CC |
| DNA94  | TT | GG | CA | GG | GG | CC |
| DNA95  | CC | GG | CC | GG | GG | CC |
| DNA96  | CT | GG | CC | GG | GG | CC |
| DNA97  | TT | GG | CA | GG | GG | CC |
| DNA98  | TT | GG | CC | GG | GG | CC |
| DNA99  | TT | GG | CA | GG | GG | CC |
| DNA100 | CC | GG | CA | CC | GG | CC |
| DNA101 | CT | GG | CC | GG | GG | CC |
| DNA102 | CT | GG | AA | GC | AA | CC |
| DNA103 | TT | GG | CC | GG | GG | CC |
| DNA104 | TT | GG | CA | GG | GG | CC |
| DNA105 | CT | GG | CC | GG | GG | CC |
| DNA106 | TT | GG | CC | GG | GG | CC |
| DNA107 | CT | GG | AA | GC | AA | CC |
| DNA108 | CT | GG | CC | GG | GG | CC |
| DNA109 | TT | GG | CC | GG | GG | CC |
| DNA110 | TT | GG | CC | GG | GG | CC |

|        |    |    |    |    |    |    |
|--------|----|----|----|----|----|----|
| DNA111 | CT | GG | AA | GC | AA | CC |
| DNA112 | TT | GG | CC | GG | GG | CC |
| DNA113 | CT | GG | CC | GG | GG | CC |
| DNA114 | TT | GG | CC | GG | GG | CC |
| DNA115 | TT | GG | CC | GG | GG | CC |
| DNA116 | CT | GG | CC | GG | GG | CC |
| DNA117 | TT | GG | CC | GG | GG | CC |
| DNA118 | CT | GG | AA | GC | AA | CC |
| DNA119 | CC | GG | CA | CC | GG | CC |
| DNA120 | CT | GG | CC | GG | GG | CC |
| DNA121 | TT | GG | CC | GG | GG | CC |
| DNA122 | TT | GG | CA | GG | GG | CC |
| DNA123 | TT | GG | CC | GG | GG | CC |
| DNA124 | TT | GG | CA | GG | GG | CC |
| DNA125 | TT | GG | CC | GG | GG | CC |
| DNA126 | TT | GG | CC | GG | GG | CC |
| DNA127 | TT | GG | CC | GG | GG | CC |
| DNA128 | TT | GG | CC | GG | GG | CC |
| DNA129 | CC | GG | CC | GG | GG | CC |
| DNA130 | TT | GG | CC | GG | GG | CC |
| DNA131 | CT | GG | CC | GG | GG | CC |
| DNA132 | TT | GG | CC | GG | GG | CC |
| DNA133 | CT | GG | CC | GG | GG | CC |
| DNA134 | CC | GG | CC | GG | GG | CC |
| DNA135 | CC | GG | CA | CC | GG | CC |
| DNA136 | CT | GG | CC | GG | GG | CC |
| DNA137 | CC | GG | CC | GG | GG | CC |
| DNA138 | CC | GG | CA | CC | GG | CC |
| DNA139 | TT | GG | CC | GG | GG | CC |
| DNA140 | TT | GG | CC | GG | GG | CC |
| DNA141 | CT | GG | CC | GG | GG | CC |
| DNA142 | CT | GG | AA | GC | AA | CC |
| DNA143 | TT | GG | CC | GG | GG | CC |
| DNA144 | CT | GG | AA | GC | AA | CC |
| DNA145 | TT | GG | CC | GG | GG | CC |
| DNA146 | TT | GG | CC | GG | GG | CC |
| DNA147 | CT | GG | CC | GG | GG | CC |
| DNA148 | TT | GG | CC | GG | GG | CC |

|        |    |    |    |    |    |    |
|--------|----|----|----|----|----|----|
| DNA149 | CC | GG | CC | GG | GG | CC |
| DNA150 | CC | GG | CC | GG | GG | CC |

Table S 2: Irisplex 6 SNP genotypes colour prediction probabilities together with samples details of Pakhtoon population.

| Sam<br>ple | rs129<br>13832 | rs180<br>0407 | rs128<br>96399 | rs168<br>91982 | rs139<br>3350 | rs122<br>03592 | P<br>Blue<br>Eye | P<br>Inter<br>Eye | P<br>Brown<br>Eye | Gen<br>der | Irisplex<br>Result | Pheno<br>Eye<br>Colour |
|------------|----------------|---------------|----------------|----------------|---------------|----------------|------------------|-------------------|-------------------|------------|--------------------|------------------------|
| Swat<br>1  | CT             | GG            | CC             | GC             | GG            | CC             | 0.012<br>23      | 0.0500<br>34      | 0.93773<br>6      | M          | Brown              | Brown                  |
| 2          | TT             | GA            | AA             | GC             | GG            | CC             | 0.000<br>223     | 0.0139<br>89      | 0.98578<br>8      | M          | Brown              | Brown                  |
| 3          | CT             | GG            | AA             | GC             | AA            | CC             | 0.012<br>23      | 0.0500<br>34      | 0.93773<br>6      | F          | Brown              | Brown                  |
| 4          | TT             | GG            | CA             | CC             | GA            | CC             | 1.29E-<br>05     | 0.0020<br>91      | 0.99789<br>6      | F          | Brown              | Brown                  |
| 5          | CC             | GG            | CC             | GG             | GG            | CC             | 0.847<br>81      | 0.0876<br>63      | 0.06452<br>7      | F          | Blue               | Blue                   |
| 6          | TT             | GA            | CA             | CC             | GG            | CC             | 4.87E-<br>05     | 0.0055<br>44      | 0.99440<br>7      | F          | Brown              | Brown                  |
| 7          | CC             | GG            | CA             | GC             | GG            | CC             | 0.649<br>894     | 0.1218<br>39      | 0.22826<br>7      | M          | Blue               | Blue                   |
| 8          | CC             | GG            | CC             | GC             | GG            | CC             | 0.649<br>894     | 0.1218<br>39      | 0.22826<br>7      | F          | Blue               | INTER                  |
| 9          | CC             | GG            | CC             | GC             | GG            | CC             | 0.649<br>894     | 0.1218<br>39      | 0.22826<br>7      | M          | Blue               | INTER                  |
| 10         | TT             | GG            | CA             | GG             | GG            | CC             | 0.000<br>272     | 0.0133<br>9       | 0.98633<br>8      | F          | Brown              | Brown                  |
| 11         | CC             | GG            | AA             | CC             | GA            | CC             | 0.337<br>744     | 0.1148<br>04      | 0.54745<br>2      | F          | Brown              | INTER                  |
| 12         | CC             | GG            | CA             | CC             | GG            | CC             | 0.337<br>744     | 0.1148<br>04      | 0.54745<br>2      | M          | Brown              | INTER                  |
| 13         | CC             | GG            | CA             | CC             | GG            | CC             | 0.337<br>744     | 0.1148<br>04      | 0.54745<br>2      | F          | Brown              | INTER                  |
| 14         | TT             | GG            | CC             | GG             | GG            | CC             | 0.000            | 0.0133            | 0.98633           | M          | Brown              | Brown                  |

|                    |    |    |    |    |    |    |              |              |              |   |           |       |
|--------------------|----|----|----|----|----|----|--------------|--------------|--------------|---|-----------|-------|
|                    |    |    |    |    |    |    | 272          | 9            | 8            |   |           |       |
| 15                 | CC | GG | CA | CC | GG | CC | 0.337<br>744 | 0.1148<br>04 | 0.54745<br>2 | F | Brown     | INTER |
| 16                 | CC | GG | AA | GC | GG | CC | 0.649<br>894 | 0.1218<br>39 | 0.22826<br>7 | M | Blue      | INTER |
| 17                 | CC | GG | CC | GC | GG | CC | 0.649<br>894 | 0.1218<br>39 | 0.22826<br>7 | M | Blue      | INTER |
| 18                 | TT | GG | CA | GG | GG | CC | 0.000<br>272 | 0.0133<br>9  | 0.98633<br>8 | F | Brown     | Brown |
| 19                 | CC | GG | CC | GG | GG | CC | 0.847<br>81  | 0.0876<br>63 | 0.06452<br>7 | F | Blue      | Blue  |
| 20                 | CC | GG | CC | GC | GG | CC | 0.649<br>894 | 0.1218<br>39 | 0.22826<br>7 | M | Blue      | INTER |
| Mala<br>kan<br>d21 | TT | GG | CC | GG | GG | CC | 0.000<br>272 | 0.0133<br>9  | 0.98633<br>8 | M | BROW<br>N | BROWN |
| 22                 | CT | GG | CA | GG | GG | CC | 0.050<br>323 | 0.1135<br>51 | 0.83612<br>6 | M | BROW<br>N | BROWN |
| 23                 | CT | GG | CA | GC | GG | CC | 0.012<br>23  | 0.0500<br>34 | 0.93773<br>6 | M | BROW<br>N | BROWN |
| 24                 | TT | GA | CC | GG | GG | CC | 0.001<br>006 | 0.0348<br>25 | 0.96416<br>9 | M | BROW<br>N | BROWN |
| 25                 | TT | GG | CA | GC | GG | CC | 5.94E-<br>05 | 0.0053<br>05 | 0.99463<br>5 | M | BROW<br>N | BROWN |
| 26                 | TT | GG | CA | GG | GG | CC | 0.000<br>272 | 0.0133<br>9  | 0.98633<br>8 | M | BROW<br>N | BROWN |
| 27                 | CC | GG | CC | GG | GG | CC | 0.847<br>81  | 0.0876<br>63 | 0.06452<br>7 | M | BLUE      | BLUE  |
| 28                 | CT | GG | CC | GC | GA | CC | 0.012<br>23  | 0.0500<br>34 | 0.93773<br>6 | F | BROW<br>N | BROWN |
| 29                 | TT | GG | CC | GG | GA | CC | 0.000<br>272 | 0.0133<br>9  | 0.98633<br>8 | M | BROW<br>N | BROWN |
| 30                 | TT | GG | CC | GG | GG | CC | 0.000<br>272 | 0.0133<br>9  | 0.98633<br>8 | F | BROW<br>N | BROWN |
| 31                 | CT | GG | CC | GG | GG | CC | 0.050<br>323 | 0.1135<br>51 | 0.83612<br>6 | F | BROW<br>N | BROWN |
| 32                 | CT | GG | CC | GG | GG | CC | 0.050<br>323 | 0.1135<br>51 | 0.83612<br>6 | F | BROW<br>N | BROWN |

|              |    |    |    |    |    |    |              |              |              |   |           |       |
|--------------|----|----|----|----|----|----|--------------|--------------|--------------|---|-----------|-------|
| 33           | CT | GG | CA | GC | GG | CC | 0.012<br>23  | 0.0500<br>34 | 0.93773<br>6 | F | BROW<br>N | BROWN |
| 34           | CT | GG | CA | GG | GG | CC | 0.050<br>323 | 0.1135<br>51 | 0.83612<br>6 | M | BROW<br>N | BROWN |
| 35           | CT | GG | CC | GG | GG | CC | 0.050<br>323 | 0.1135<br>51 | 0.83612<br>6 | F | BROW<br>N | BROWN |
| 36           | CT | GG | CC | GG | GG | CC | 0.050<br>323 | 0.1135<br>51 | 0.83612<br>6 | M | BROW<br>N | INTER |
| 37           | CT | GG | CC | GG | GG | CC | 0.050<br>323 | 0.1135<br>51 | 0.83612<br>6 | F | BROW<br>N | BROWN |
| 38           | CT | GG | CC | GC | GG | CC | 0.012<br>23  | 0.0500<br>34 | 0.93773<br>6 | F | BROW<br>N | BROWN |
| 39           | CT | GG | CA | GG | GG | CC | 0.050<br>323 | 0.1135<br>51 | 0.83612<br>6 | F | BROW<br>N | BROWN |
| 40           | CT | GG | CC | GC | GG | CC | 0.012<br>23  | 0.0500<br>34 | 0.93773<br>6 | F | BROW<br>N | INTER |
| Bun<br>er 41 | TT | GA | CC | GG | GA | CC | 0.001<br>006 | 0.0348<br>25 | 0.96416<br>9 | F | BROW<br>N | BROWN |
| 42           | CT | GG | CC | GG | GG | CC | 0.050<br>323 | 0.1135<br>51 | 0.83612<br>6 | F | BROW<br>N | BROWN |
| 43           | TT | GG | CA | GG | GG | CC | 0.000<br>272 | 0.0133<br>9  | 0.98633<br>8 | F | BROW<br>N | BROWN |
| 44           | TT | GG | CC | GG | GG | CC | 0.000<br>272 | 0.0133<br>9  | 0.98633<br>8 | F | BROW<br>N | BROWN |
| 45           | CT | GG | AA | GG | GG | CC | 0.050<br>323 | 0.1135<br>51 | 0.83612<br>6 | F | BROW<br>N | INTER |
| 46           | CC | GG | CC | GG | GG | CC | 0.847<br>81  | 0.0876<br>63 | 0.06452<br>7 | M | BLUE      | BLUE  |
| 47           | CT | GA | CC | GC | GG | CC | 0.041<br>43  | 0.1191<br>62 | 0.83940<br>8 | F | BROW<br>N | BROWN |
| 48           | CT | GG | CC | GC | GA | CC | 0.012<br>23  | 0.0500<br>34 | 0.93773<br>6 | M | BROW<br>N | BROWN |
| 49           | CT | GG | CC | GC | GG | CC | 0.012<br>23  | 0.0500<br>34 | 0.93773<br>6 | M | BROW<br>N | INTER |
| 50           | TT | GG | CA | GC | GA | CC | 5.94E-<br>05 | 0.0053<br>05 | 0.99463<br>5 | M | BROW<br>N | BROWN |
| 51           | CT | GG | CA | GG | GG | CC | 0.050<br>323 | 0.1135<br>51 | 0.83612<br>6 | M | BROW<br>N | BROWN |

|                   |    |    |    |    |    |    |              |              |              |   |           |       |
|-------------------|----|----|----|----|----|----|--------------|--------------|--------------|---|-----------|-------|
| 52                | CT | GA | CC | GC | GG | CC | 0.041<br>43  | 0.1191<br>62 | 0.83940<br>8 | M | BROW<br>N | INTER |
| 53                | TT | GG | CC | GG | GG | CC | 0.000<br>272 | 0.0133<br>9  | 0.98633<br>8 | F | BROW<br>N | BROWN |
| 54                | CT | GA | CC | GC | GA | CC | 0.041<br>43  | 0.1191<br>62 | 0.83940<br>8 | M | BROW<br>N | INTER |
| 55                | TT | GG | CA | GG | GG | CC | 0.000<br>272 | 0.0133<br>9  | 0.98633<br>8 | F | BROW<br>N | BROWN |
| 56                | CT | GG | CA | GG | GG | CC | 0.050<br>323 | 0.1135<br>51 | 0.83612<br>6 | M | BROW<br>N | INTER |
| 57                | CT | GA | CA | GG | GG | CC | 0.001<br>006 | 0.0348<br>25 | 0.96416<br>9 | M | BROW<br>N | INTER |
| 58                | CT | GG | CA | GG | GG | CC | 0.050<br>323 | 0.1135<br>51 | 0.83612<br>6 | M | BROW<br>N | BROWN |
| 59                | TT | GG | CC | GG | GG | CC | 0.000<br>272 | 0.0133<br>9  | 0.98633<br>8 | F | BROW<br>N | BROWN |
| 60                | CT | GG | CC | GG | GG | CC | 0.050<br>323 | 0.1135<br>51 | 0.83612<br>6 | F | BROW<br>N | INTER |
| Shan<br>gla<br>61 | CT | GG | CA | GC | GG | CC | 0.012<br>23  | 0.0500<br>34 | 0.93773<br>6 | F | BROW<br>N | INTER |
| 62                | TT | GA | CC | GG | GG | CC | 0.001<br>006 | 0.0348<br>25 | 0.96416<br>9 | F | BROW<br>N | BROWN |
| 63                | CT | GG | CA | GC | GG | CT | 0.022<br>247 | 0.0903<br>19 | 0.88743<br>4 | M | BROW<br>N | BROWN |
| 64                | CT | GG | CC | CC | GG | CC | 0.002<br>76  | 0.0204<br>76 | 0.97676<br>4 | F | BROW<br>N | BROWN |
| 65                | CT | GA | CA | CC | GG | CC | 0.010<br>029 | 0.0522<br>98 | 0.93767<br>4 | F | BROW<br>N | BROWN |
| 66                | CT | GA | CC | CC | GG | CC | 0.010<br>029 | 0.0522<br>98 | 0.93767<br>4 | M | BROW<br>N | BROWN |
| 67                | TT | GA | CC | CC | GG | CC | 4.87E-<br>05 | 0.0055<br>44 | 0.99440<br>7 | M | BROW<br>N | BROWN |
| 68                | CT | GG | CC | GG | GG | CC | 0.050<br>323 | 0.1135<br>51 | 0.83612<br>6 | F | BROW<br>N | BROWN |
| 69                | TT | GA | CA | GC | GG | CC | 0.000<br>223 | 0.0139<br>89 | 0.98578<br>8 | F | BROW<br>N | BROWN |
| 70                | CC | GG | CC | GG | GG | CC | 0.847        | 0.0876       | 0.06452      | M | BLUE      | BLUE  |



|                |    |    |    |    |    |    |          |          |          |   |       |       |
|----------------|----|----|----|----|----|----|----------|----------|----------|---|-------|-------|
|                |    |    |    |    |    |    | 81       | 63       | 7        |   |       |       |
| 71             | TT | GA | CA | GG | GA | CC | 0.001006 | 0.034825 | 0.964169 | F | BROWN | BROWN |
| 72             | TT | GG | CC | GG | GG | CC | 0.000272 | 0.01339  | 0.986338 | F | BROWN | BROWN |
| 73             | CT | GG | CC | GG | GG | CC | 0.050323 | 0.113551 | 0.836126 | F | BROWN | BROWN |
| 74             | TT | GG | CC | GC | GG | CC | 5.94E-05 | 0.005305 | 0.994635 | F | BROWN | BROWN |
| 75             | CT | GG | CA | CC | GG | CC | 0.00276  | 0.020476 | 0.976764 | F | BROWN | BROWN |
| 76             | CT | GG | CC | GC | GG | CC | 0.01223  | 0.050034 | 0.937736 | F | BROWN | BROWN |
| 77             | TT | GG | CC | GG | GG | CC | 0.000272 | 0.01339  | 0.986338 | F | BROWN | BROWN |
| 78             | CT | GG | CC | GG | GG | CC | 0.050323 | 0.113551 | 0.836126 | F | BROWN | BROWN |
| 79             | CT | GG | CC | GG | GG | CC | 0.050323 | 0.113551 | 0.836126 | F | BROWN | INTER |
| 80             | CT | GG | CC | CC | GG | CC | 0.050323 | 0.113551 | 0.836126 | F | BROWN | BROWN |
| L<br>Dir<br>81 | TT | GG | CC | GG | GG | CC | 0.000272 | 0.01339  | 0.986338 | M | BROWN | BROWN |
| 82             | TT | GG | CC | GG | GG | CC | 0.000272 | 0.01339  | 0.986338 | M | BROWN | BROWN |
| 83             | CT | GG | CC | GG | GG | CC | 0.050323 | 0.113551 | 0.836126 | F | BROWN | BROWN |
| 84             | CC | GG | CC | GC | GG | CC | 0.649894 | 0.121839 | 0.228267 | M | BLUE  | INTER |
| 85             | CT | GG | CC | GG | GG | CC | 0.050323 | 0.113551 | 0.836126 | M | BROWN | BROWN |
| 86             | CT | GG | AA | GC | AA | CC | 0.01223  | 0.050034 | 0.937736 | F | BROWN | BROWN |
| 87             | TT | GG | CC | GG | GG | CC | 0.000272 | 0.01339  | 0.986338 | M | BROWN | BROWN |
| 88             | CT | GG | AA | GC | AA | CC | 0.01223  | 0.050034 | 0.937736 | M | BROWN | BROWN |

|                |    |    |    |    |    |    |              |              |              |   |           |       |
|----------------|----|----|----|----|----|----|--------------|--------------|--------------|---|-----------|-------|
| 89             | CC | GG | CC | GG | GG | CC | 0.847<br>81  | 0.0876<br>63 | 0.06452<br>7 | M | BLUE      | BLUE  |
| 90             | CT | GG | AA | GC | AA | CC | 0.012<br>23  | 0.0500<br>34 | 0.93773<br>6 | F | BROW<br>N | BROWN |
| 91             | CT | GG | CC | GG | GG | CC | 0.050<br>323 | 0.1135<br>51 | 0.83612<br>6 | F | BROW<br>N | BROWN |
| 92             | CT | GG | CC | GG | GG | CC | 0.050<br>323 | 0.1135<br>51 | 0.83612<br>6 | M | BROW<br>N | INTER |
| 93             | TT | GG | CC | GG | GG | CC | 0.000<br>272 | 0.0133<br>9  | 0.98633<br>8 | M | BROW<br>N | BROWN |
| 94             | TT | GG | CA | GG | GG | CC | 0.000<br>272 | 0.0133<br>9  | 0.98633<br>8 | F | BROW<br>N | BROWN |
| 95             | CC | GG | CC | GG | GG | CC | 0.847<br>81  | 0.0876<br>63 | 0.06452<br>7 | M | BLUE      | BLUE  |
| 96             | CT | GG | CC | GG | GG | CC | 0.050<br>323 | 0.1135<br>51 | 0.83612<br>6 | M | BROW<br>N | BROWN |
| 97             | TT | GG | CA | GG | GG | CC | 0.000<br>272 | 0.0133<br>9  | 0.98633<br>8 | M | BROW<br>N | BROWN |
| 98             | TT | GG | CC | GG | GG | CC | 0.000<br>272 | 0.0133<br>9  | 0.98633<br>8 | F | BROW<br>N | BROWN |
| 99             | TT | GG | CA | GG | GG | CC | 0.000<br>272 | 0.0133<br>9  | 0.98633<br>8 | F | BROW<br>N | BROWN |
| 100            | CC | GG | CA | CC | GG | CC | 0.337<br>744 | 0.1148<br>04 | 0.54745<br>2 | M | BROW<br>N | INTER |
| Chitral<br>101 | CT | GG | CC | GG | GG | CC | 0.050<br>323 | 0.1135<br>51 | 0.83612<br>6 | M | BROW<br>N | BROWN |
| 102            | CT | GG | AA | GC | AA | CC | 0.012<br>23  | 0.0500<br>34 | 0.93773<br>6 | F | BROW<br>N | BROWN |
| 103            | TT | GG | CC | GG | GG | CC | 0.000<br>272 | 0.0133<br>9  | 0.98633<br>8 | M | BROW<br>N | BROWN |
| 104            | TT | GG | CA | GG | GG | CC | 0.000<br>272 | 0.0133<br>9  | 0.98633<br>8 | F | BROW<br>N | BROWN |
| 105            | CT | GG | CC | GG | GG | CC | 0.050<br>323 | 0.1135<br>51 | 0.83612<br>6 | F | BROW<br>N | BROWN |
| 106            | TT | GG | CC | GG | GG | CC | 0.000<br>272 | 0.0133<br>9  | 0.98633<br>8 | F | BROW<br>N | BROWN |
| 107            | CT | GG | AA | GC | AA | CC | 0.012        | 0.0500       | 0.93773      | F | BROW      | BROWN |

|              |    |    |    |    |    |    |              |              |              |   |           |       |
|--------------|----|----|----|----|----|----|--------------|--------------|--------------|---|-----------|-------|
|              |    |    |    |    |    |    | 23           | 34           | 6            |   | N         |       |
| 108          | CT | GG | CC | GG | GG | CC | 0.050<br>323 | 0.1135<br>51 | 0.83612<br>6 | F | BROW<br>N | BROWN |
| 109          | TT | GG | CC | GG | GG | CC | 0.000<br>272 | 0.0133<br>9  | 0.98633<br>8 | F | BROW<br>N | BROWN |
| 110          | TT | GG | CC | GG | GG | CC | 0.000<br>272 | 0.0133<br>9  | 0.98633<br>8 | F | BROW<br>N | BROWN |
| 111          | CT | GG | AA | GC | AA | CC | 0.012<br>23  | 0.0500<br>34 | 0.93773<br>6 | M | BROW<br>N | BROWN |
| 112          | TT | GG | CC | GG | GG | CC | 0.000<br>272 | 0.0133<br>9  | 0.98633<br>8 | M | BROW<br>N | BROWN |
| 113          | CT | GG | CC | GG | GG | CC | 0.050<br>323 | 0.1135<br>51 | 0.83612<br>6 | M | BROW<br>N | BROWN |
| 114          | TT | GG | CC | GG | GG | CC | 0.000<br>272 | 0.0133<br>9  | 0.98633<br>8 | M | BROW<br>N | BROWN |
| 115          | TT | GG | CC | GG | GG | CC | 0.000<br>272 | 0.0133<br>9  | 0.98633<br>8 | M | BROW<br>N | BROWN |
| 116          | CT | GG | CC | GG | GG | CC | 0.050<br>323 | 0.1135<br>51 | 0.83612<br>6 | M | BROW<br>N | BROWN |
| 117          | TT | GG | CC | GG | GG | CC | 0.000<br>272 | 0.0133<br>9  | 0.98633<br>8 | M | BROW<br>N | BROWN |
| 118          | CT | GG | AA | GC | AA | CC | 0.012<br>23  | 0.0500<br>34 | 0.93773<br>6 | M | BROW<br>N | BROWN |
| 119          | CC | GG | CA | CC | GG | CC | 0.337<br>744 | 0.1148<br>04 | 0.54745<br>2 | M | BROW<br>N | INTER |
| 120          | CT | GG | CC | GG | GG | CC | 0.050<br>323 | 0.1135<br>51 | 0.83612<br>6 | M | BROW<br>N | BROWN |
| U.Di<br>r121 | TT | GG | CC | GG | GG | CC | 0.000<br>272 | 0.0133<br>9  | 0.98633<br>8 | F | BROW<br>N | BRWON |
| 122          | TT | GG | CA | GG | GG | CC | 0.000<br>272 | 0.0133<br>9  | 0.98633<br>8 | M | BROW<br>N | BROWN |
| 123          | TT | GG | CC | GG | GG | CC | 0.000<br>272 | 0.0133<br>9  | 0.98633<br>8 | M | BROW<br>N | BROWN |
| 124          | TT | GG | CA | GG | GG | CC | 0.000<br>272 | 0.0133<br>9  | 0.98633<br>8 | M | BROW<br>N | BROWN |
| 125          | TT | GG | CC | GG | GG | CC | 0.000<br>272 | 0.0133<br>9  | 0.98633<br>8 | M | BROW<br>N | BROWN |
| 126          | TT | GG | CC | GG | GG | CC | 0.000        | 0.0133       | 0.98633      | F | BROW      | BROWN |

|      |    |    |    |    |    |    |       |        |         |   |      |       |
|------|----|----|----|----|----|----|-------|--------|---------|---|------|-------|
|      |    |    |    |    |    |    | 272   | 9      | 8       |   | N    |       |
| 127  | TT | GG | CC | GG | GG | CC | 0.000 | 0.0133 | 0.98633 | M | BROW | BROWN |
|      |    |    |    |    |    |    | 272   | 9      | 8       |   | N    |       |
| 128  | TT | GG | CC | GG | GG | CC | 0.000 | 0.0133 | 0.98633 | M | BROW | BROWN |
|      |    |    |    |    |    |    | 272   | 9      | 8       |   | N    |       |
| 129  | CC | GG | CC | GG | GG | CC | 0.847 | 0.0876 | 0.06452 | F | BLUE | BLUE  |
|      |    |    |    |    |    |    | 81    | 63     | 7       |   |      |       |
| 130  | TT | GG | CC | GG | GG | CC | 0.000 | 0.0133 | 0.98633 | M | BROW | BROWN |
|      |    |    |    |    |    |    | 272   | 9      | 8       |   | N    |       |
| 131  | CT | GG | CC | GG | GG | CC | 0.050 | 0.1135 | 0.83612 | M | BROW | BROWN |
|      |    |    |    |    |    |    | 323   | 51     | 6       |   | N    |       |
| 132  | TT | GG | CC | GG | GG | CC | 0.000 | 0.0133 | 0.98633 | M | BROW | BROWN |
|      |    |    |    |    |    |    | 272   | 9      | 8       |   | N    |       |
| 133  | CT | GG | CC | GG | GG | CC | 0.050 | 0.1135 | 0.83612 | M | BROW | BROWN |
|      |    |    |    |    |    |    | 323   | 51     | 6       |   | N    |       |
| 134  | CC | GG | CC | GG | GG | CC | 0.847 | 0.0876 | 0.06452 | M | BLUE | BLUE  |
|      |    |    |    |    |    |    | 81    | 63     | 7       |   |      |       |
| 135  | CC | GG | CA | CC | GG | CC | 0.337 | 0.1148 | 0.54745 | M | BROW | INTER |
|      |    |    |    |    |    |    | 744   | 04     | 2       |   | N    |       |
| 136  | CT | GG | CC | GG | GG | CC | 0.050 | 0.1135 | 0.83612 | M | BROW | Brown |
|      |    |    |    |    |    |    | 323   | 51     | 6       |   | N    |       |
| 137  | CC | GG | CC | GG | GG | CC | 0.847 | 0.0876 | 0.06452 | M | BLUE | BLUE  |
|      |    |    |    |    |    |    | 81    | 63     | 7       |   |      |       |
| 138  | CC | GG | CA | CC | GG | CC | 0.337 | 0.1148 | 0.54745 | M | BROW | INTER |
|      |    |    |    |    |    |    | 744   | 04     | 2       |   | N    |       |
| 139  | TT | GG | CC | GG | GG | CC | 0.000 | 0.0133 | 0.98633 | M | BROW | BROWN |
|      |    |    |    |    |    |    | 272   | 9      | 8       |   | N    |       |
| 140  | TT | GG | CC | GG | GG | CC | 0.000 | 0.0133 | 0.98633 | M | BROW | BROWN |
|      |    |    |    |    |    |    | 272   | 9      | 8       |   | N    |       |
| 141  | CT | GG | CC | GG | GG | CC | 0.050 | 0.1135 | 0.83612 | M | BROW | BROWN |
|      |    |    |    |    |    |    | 323   | 51     | 6       |   | N    |       |
| 142  | CT | GG | AA | GC | AA | CC | 0.012 | 0.0500 | 0.93773 | M | BROW | BROWN |
|      |    |    |    |    |    |    | 23    | 34     | 6       |   | N    |       |
| 143  | TT | GG | CC | GG | GG | CC | 0.000 | 0.0133 | 0.98633 | F | BROW | BROWN |
|      |    |    |    |    |    |    | 272   | 9      | 8       |   | N    |       |
| 144  | CT | GG | AA | GC | AA | CC | 0.012 | 0.0500 | 0.93773 | F | BROW | BROWN |
|      |    |    |    |    |    |    | 23    | 34     | 6       |   | N    |       |
| Swat | TT | GG | CC | GG | GG | CC | 0.000 | 0.0133 | 0.98633 | F | BROW | BROWN |

|     |    |    |    |    |    |    |              |              |              |   |           |       |
|-----|----|----|----|----|----|----|--------------|--------------|--------------|---|-----------|-------|
| 145 |    |    |    |    |    |    | 272          | 9            | 8            |   | N         |       |
| 146 | TT | GG | CC | GG | GG | CC | 0.000<br>272 | 0.0133<br>9  | 0.98633<br>8 | M | BROW<br>N | BROWN |
| 147 | CT | GG | CC | GG | GG | CC | 0.050<br>323 | 0.1135<br>51 | 0.83612<br>6 | M | BROW<br>N | Brown |
| 148 | TT | GG | CC | GG | GG | CC | 0.000<br>272 | 0.0133<br>9  | 0.98633<br>8 | F | BROW<br>N | BROWN |
| 149 | CC | GG | CC | GG | GG | CC | 0.847<br>81  | 0.0876<br>63 | 0.06452<br>7 | M | BLUE      | BLUE  |
| 150 | CC | GG | CC | GG | GG | CC | 0.847<br>81  | 0.0876<br>63 | 0.06452<br>7 | M | BLUE      | BLUE  |

Table S 3: FROG- kb 6 SNP genotypes and colour prediction probabilities together with samples details of Pakhtoon population. Blue colour indicated Blue eye colour, green indicated Intermediate and brown colour indicated brown eye colour

| Sam<br>ple<br>ID | rs1800<br>407 | rs168<br>918 | rs1393<br>350 | rs1291<br>3832 | rs1289<br>6399 | rs1220<br>3592 | P-<br>Blue   | P-<br>Interme<br>diate | P-<br>Brow<br>n | Predic<br>ted<br>eye | Actu<br>al<br>Eye<br>Colo<br>ur |
|------------------|---------------|--------------|---------------|----------------|----------------|----------------|--------------|------------------------|-----------------|----------------------|---------------------------------|
| 1                | CT            | G            | CC            | GC             | GG             | CC             | 0.024<br>17  | 0.08345                | 0.892<br>4      | Brow<br>n            | Brow<br>n                       |
| 2                | TT            | A            | AA            | GC             | GG             | CC             | 0.001<br>808 | 0.03577                | 0.962<br>4      | Brow<br>n            | Brow<br>n                       |
| 3                | CT            | GG           | AA            | GC             | AA             | CC             | 0.918<br>9   | 0.04365                | 0.037<br>43     | Blue                 | Brow<br>n                       |
| 4                | TT            | GG           | CA            | CC             | GA             | CC             | 1.17E<br>-04 | 0.007928               | 0.992           | Brow<br>n            | Brow<br>n                       |
| 5                | CC            | GG           | CC            | GG             | GG             | CC             | 0.870<br>2   | 0.07638                | 0.053<br>47     | Blue                 | Blue                            |
| 6                | TT            | GA           | CA            | CC             | GG             | CC             | 2.37E<br>-04 | 0.01735                | 0.982<br>4      | Brow<br>n            | Brow<br>n                       |
| 7                | CC            | GG           | CA            | GC             | GG             | CC             | 0.779<br>9   | 0.08983                | 0.130<br>3      | Blue                 | Blue                            |
| 8                | CC            | GG           | CC            | GC             | GG             | CC             | 0.677<br>6   | 0.131                  | 0.191<br>5      | Blue                 | INTE<br>R                       |
| 9                | CC            | GG           | CC            | GC             | GG             | CC             | 0.677<br>6   | 0.131                  | 0.191<br>5      | Blue                 | INTE<br>R                       |
| 10               | TT            | GG           | CA            | GG             | GG             | CC             | 2.37E<br>-04 | 0.01735                | 0.982<br>4      | Brow<br>n            | Brow<br>n                       |
| 11               | CC            | GG           | AA            | CC             | GA             | CC             | 0.705<br>5   | 0.08871                | 0.205<br>8      | Blue                 | INTE<br>R                       |
| 12               | CC            | GG           | CA            | CC             | GG             | CC             | 0.494<br>6   | 0.1254                 | 0.38            | Blue                 | INTE<br>R                       |
| 13               | CC            | GG           | CA            | CC             | GG             | CC             | 0.367        | 0.1562                 | 0.476<br>8      | Brow<br>n            | INTE<br>R                       |
| 14               | TT            | GG           | CC            | GG             | GG             | CC             | 2.37E<br>-04 | 0.01735                | 0.982<br>4      | Brow<br>n            | Brow<br>n                       |
| 15               | CC            | GG           | CA            | CC             | GG             | CC             | 0.494<br>6   | 0.1254                 | 0.38            | Blue                 | INTE<br>R                       |
| 16               | CC            | GG           | AA            | GC             | GG             | CC             | 0.856<br>6   | 0.0588                 | 0.084<br>64     | Blue                 | INTE<br>R                       |
| 17               | CC            | GG           | CC            | GC             | GG             | CC             | 0.677<br>6   | 0.131                  | 0.191<br>5      | Blue                 | INTE<br>R                       |
| 18               | TT            | GG           | CA            | GG             | GG             | CC             | 7.17E<br>-04 | 0.00613                | 0.993<br>8      | Brow<br>n            | Brow<br>n                       |
| 19               | CC            | GG           | CC            | GG             | GG             | CC             | 0.870<br>2   | 0.07638                | 0.053<br>447    | Blue                 | Blue                            |
| 20               | CC            | GG           | CC            | GC             | GG             | CC             | 0.677<br>6   | 0.131                  | 0.191<br>5      | Blue                 | INTE<br>R                       |
| 21               | TT            | GG           | CC            | GG             | GG             | CC             | 7.17E<br>-04 | 0.00613                | 0.993<br>8      | Brow<br>n            | BRO<br>WN                       |

|    |    |    |    |    |    |    |          |          |         |       |       |
|----|----|----|----|----|----|----|----------|----------|---------|-------|-------|
| 22 | CT | GG | CA | GG | GG | CC | 0.1496   | 0.1398   | 0.7105  | Brown | BROWN |
| 23 | CT | GG | CA | GC | GG | CC | 0.04017  | 0.08266  | 0.8772  | Brown | BROWN |
| 24 | TT | GA | CC | GG | GG | CC | 0.0027   | 0.0708   | 0.9264  | Brown | BROWN |
| 25 | TT | GG | CA | GC | GG | CC | 3.46E-04 | 0.01271  | 0.9869  | Brown | BROWN |
| 26 | TT | GG | CA | GG | GG | CC | 2.75E-05 | 0.02597  | 0.9731  | Brown | BROWN |
| 27 | CC | GG | CC | GG | GG | CC | 0.367    | 0.1562   | 0.4768  | Brown | BLUE  |
| 28 | CT | GG | CC | GC | GA | CC | 0.03626  | 0.1041   | 0.8596  | Brown | BROWN |
| 29 | TT | GG | CC | GG | GA | CC | 0.001433 | 0.03338  | 0.9652  | Brown | BROWN |
| 30 | TT | GG | CC | GG | GG | CC | 0.001433 | 0.03338  | 0.9652  | Brown | BROWN |
| 31 | CT | GG | CC | GG | GG | CC | 4.48E-05 | 0.006084 | 0.9939  | Brown | BROWN |
| 32 | CT | GG | CC | GG | GG | CC | 0.005606 | 0.04262  | 0.9518  | Brown | BROWN |
| 33 | CT | GG | CA | GC | GG | CC | 0.02417  | 0.08345  | 0.8924  | Brown | BROWN |
| 34 | CT | GG | CA | GG | GG | CC | 0.1496   | 0.1398   | 0.7105  | Brown | BROWN |
| 35 | CT | GG | CC | GG | GG | CC | 0.09436  | 0.1479   | 0.7577  | Brown | BROWN |
| 36 | CT | GG | CC | GG | GG | CC | 0.09436  | 0.1479   | 0.7577  | Brown | INTER |
| 37 | CT | GG | CC | GG | GG | CC | 0.09436  | 0.1479   | 0.7577  | Brown | BROWN |
| 38 | CT | GG | CC | GC | GG | CC | 0.09436  | 0.1479   | 0.7577  | Brown | BROWN |
| 39 | CT | GG | CA | GG | GG | CC | 0.00944  | 0.04277  | 0.9478  | Brown | BROWN |
| 40 | CT | GG | CC | GC | GG | CC | 0.09436  | 0.1479   | 0.7577  | Brown | INTER |
| 41 | TT | GA | CC | GG | GA | CC | 0.004263 | 0.08972  | 0.906   | Brown | BROWN |
| 42 | CT | GG | CC | GG | GG | CC | 0.005606 | 0.04262  | 0.9518  | Brown | BROWN |
| 43 | TT | GG | CA | GG | GG | CC | 0.001567 | 0.02615  | 0.9723  | Brown | BROWN |
| 44 | TT | GG | CC | GG | GG | CC | 9.28E-04 | 0.02597  | 0.9731  | Brown | BROWN |
| 45 | CT | GG | AA | GG | GG | CC | 0.2291   | 0.1276   | 0.6433  | Brown | INTER |
| 46 | CC | GG | CC | GG | GG | CC | 0.8702   | 0.07638  | 0.05347 | Blue  | BLUE  |
| 47 | CT | GA | CC | GC | GG | CC | 0.063    | 0.1978   | 0.738   | Brown | BRO   |

|    |    |    |    |    |    |    |          |         |        |       |       |
|----|----|----|----|----|----|----|----------|---------|--------|-------|-------|
|    |    |    |    |    |    |    | 42       |         | 8      | n     | WN    |
| 48 | CT | GG | CC | GC | GA | CC | 0.03626  | 0.1041  | 0.8596 | Brown | BROWN |
| 49 | CT | GG | CC | GC | GG | CC | 0.02417  | 0.08345 | 0.8924 | Brown | INTER |
| 50 | TT | GG | CA | GC | GA | CC | 5.37E-04 | 0.01641 | 0.9831 | Brown | BROWN |
| 51 | CT | GG | CA | GG | GG | CC | 0.1496   | 0.1398  | 0.7105 | Brown | BROWN |
| 52 | CT | GA | CC | GC | GG | CC | 0.06342  | 0.1978  | 0.7388 | Brown | INTER |
| 53 | TT | GG | CC | GG | GG | CC | 9.28E-04 | 0.02597 | 0.9731 | Brown | BROWN |
| 54 | CT | GA | CC | GC | GA | CC | 0.09031  | 0.2343  | 0.6754 | Brown | INTER |
| 55 | TT | GG | CA | GG | GG | CC | 0.001567 | 0.02615 | 0.9723 | Brown | BROWN |
| 56 | CT | GG | CA | GG | GG | CC | 0.001567 | 0.02615 | 0.9723 | Brown | INTER |
| 57 | CT | GA | CA | GG | GG | CC | 0.2992   | 0.2526  | 0.4482 | Brown | INTER |
| 58 | CT | GG | CA | GG | GG | CC | 0.745    | 0.1198  | 0.1352 | Blue  | BROWN |
| 59 | TT | GG | CC | GG | GG | CC | 9.28E-04 | 0.02597 | 0.9731 | Brown | BROWN |
| 60 | CT | GG | CC | GG | GG | CC | 0.09436  | 0.1479  | 0.7577 | Brown | INTER |
| 61 | CT | GG | CA | GC | GG | CC | 0.09436  | 0.1479  | 0.7577 | Brown | INTER |
| 62 | TT | GA | CC | GG | GG | CC | 0.002799 | 0.0708  | 0.9264 | Brown | BROWN |
| 63 | CT | GG | CA | GC | GG | CT | 0.04017  | 0.08266 | 0.8772 | Brown | BROWN |
| 64 | CT | GG | CC | CC | GG | CC | 0.005606 | 0.04262 | 0.9518 | Brown | BROWN |
| 65 | CT | GA | CA | CC | GG | CC | 0.0272   | 0.1113  | 0.8615 | Brown | BROWN |
| 66 | CT | GA | CC | CC | GG | CC | 0.01628  | 0.1118  | 0.8719 | Brown | BROWN |
| 67 | TT | GA | CC | CC | GG | CC | 1.40E-04 | 0.01722 | 0.9826 | Brown | BROWN |
| 68 | CT | GG | CC | GG | GG | CC | 0.09436  | 0.1479  | 0.7577 | Brown | BROWN |
| 69 | TT | GA | CA | GC | GG | CC | 0.00107  | 0.03553 | 0.9634 | Brown | BROWN |
| 70 | CC | GG | CC | GG | GG | CC | 0.6776   | 0.131   | 0.1915 | Blue  | BLUE  |
| 71 | TT | GA | CA | GG | GA | CC | 0.007182 | 0.09008 | 0.9027 | Brown | BROWN |
| 72 | TT | GG | CC | GG | GG | CC | 9.28E-04 | 0.02597 | 0.9731 | Brown | BROWN |



|    |    |    |    |    |    |    |          |         |         |       |       |
|----|----|----|----|----|----|----|----------|---------|---------|-------|-------|
| 73 | CT | GG | CC | GG | GG | CC | 9436     | 0.1479  | 0.7577  | Brown | BROWN |
| 74 | TT | GG | CC | GC | GG | CC | 2.05E-04 | 0.01262 | 0.9872  | Brown | BROWN |
| 75 | CT | GG | CA | CC | GG | CC | 0.00944  | 0.04277 | 0.9478  | Brown | BROWN |
| 76 | CT | GG | CC | GC | GG | CC | 0.02417  | 0.08345 | 0.8924  | Brown | BROWN |
| 77 | TT | GG | CC | GG | GG | CC | 9.28E-04 | 0.02597 | 0.9731  | Brown | BROWN |
| 78 | CT | GG | CC | GG | GG | CC | 0.09436  | 0.1479  | 0.7577  | Brown | BROWN |
| 79 | CT | GG | CC | GG | GG | CC | 0.09436  | 0.1479  | 0.7577  | Brown | INTER |
| 80 | CT | GG | CC | CC | GG | CC | 0.005606 | 0.04262 | 0.9518  | Brown | BROWN |
| 81 | TT | GG | CC | GG | GG | CC | 9.28E-04 | 0.02597 | 0.9731  | Brown | BROWN |
| 82 | TT | GG | CC | GG | GG | CC | 9.28E-04 | 0.02597 | 0.9731  | Brown | BROWN |
| 83 | CT | GG | CC | GG | GG | CC | 0.09436  | 0.1479  | 0.7577  | Brown | BROWN |
| 84 | CC | GG | CC | GC | GG | CC | 0.6776   | 0.131   | 0.1915  | Blue  | INTER |
| 85 | CT | GG | CC | GG | GG | CC | 0.09436  | 0.1479  | 0.7577  | Brown | BROWN |
| 86 | CT | GG | AA | GC | AA | CC | 0.1394   | 0.1183  | 0.7422  | Brown | BROWN |
| 87 | TT | GG | CC | GG | GG | CC | 9.28E-04 | 0.02597 | 0.9731  | Brown | BROWN |
| 88 | CT | GG | AA | GC | AA | CC | 0.1394   | 0.1183  | 0.7422  | Brown | BROWN |
| 89 | CC | GG | CC | GG | GG | CC | 0.8702   | 0.07638 | 0.05347 | Blue  | BLUE  |
| 90 | CT | GG | AA | GC | AA | CC | 0.1394   | 0.1183  | 0.7422  | Brown | BROWN |
| 91 | CT | GG | CC | GG | GG | CC | 0.09436  | 0.1479  | 0.7577  | Brown | BROWN |
| 92 | CT | GG | CC | GG | GG | CC | 0.09436  | 0.1479  | 0.7577  | Brown | INTER |
| 93 | TT | GG | CC | GG | GG | CC | 9.28E-04 | 0.02597 | 0.9731  | Brown | BROWN |
| 94 | TT | GG | CA | GG | GG | CC | 0.001567 | 0.02615 | 0.9723  | Brown | BROWN |
| 95 | CC | GG | CC | GG | GG | CC | 0.8702   | 0.07638 | 0.05347 | Blue  | BLUE  |
| 96 | CT | GG | CC | GG | GG | CC | 0.09436  | 0.1479  | 0.7577  | Brown | BROWN |
| 97 | TT | GG | CA | GG | GG | CC | 0.001567 | 0.02615 | 0.9723  | Brown | BROWN |
| 98 | TT | GG | CC | GG | GG | CC | 9.28E    | 0.02597 | 0.973   | Brown | BRO   |

|     |    |    |    |    |    |    |          |         |        |       |       |
|-----|----|----|----|----|----|----|----------|---------|--------|-------|-------|
|     |    |    |    |    |    |    | -04      |         | 1      | n     | WN    |
| 99  | TT | GG | CA | GG | GG | CC | 0.001567 | 0.02615 | 0.9723 | Brown | BROWN |
| 100 | CC | GG | CA | CC | GG | CC | 0.4946   | 0.1254  | 0.38   | Blue  | INTER |
| 101 | CT | GG | CC | GG | GG | CC | 0.09436  | 0.1479  | 0.7577 | Brown | BROWN |
| 102 | CT | GG | AA | GC | AA | CC | 0.1394   | 0.1183  | 0.7422 | Brown | BROWN |
| 103 | TT | GG | CC | GG | GG | CC | 9.28E-04 | 0.02597 | 0.9731 | Brown | BROWN |
| 104 | TT | GG | CA | GG | GG | CC | 0.001567 | 0.02615 | 0.9723 | Brown | BROWN |
| 105 | CT | GG | CC | GG | GG | CC | 0.09436  | 0.1479  | 0.7577 | Brown | BROWN |
| 106 | TT | GG | CC | GG | GG | CC | 9.28E-04 | 0.02597 | 0.9731 | Brown | BROWN |
| 107 | CT | GG | AA | GC | AA | CC | 0.1394   | 0.1183  | 0.7422 | Brown | BROWN |
| 108 | CT | GG | CC | GG | GG | CC | 0.09436  | 0.1479  | 0.7577 | Brown | BROWN |
| 109 | TT | GG | CC | GG | GG | CC | 9.28E-04 | 0.02597 | 0.9731 | Brown | BROWN |
| 110 | TT | GG | CC | GG | GG | CC | 0.09436  | 0.1479  | 0.7577 | Brown | BROWN |
| 111 | CT | GG | AA | GC | AA | CC | 0.1394   | 0.1183  | 0.7422 | Brown | BROWN |
| 112 | TT | GG | CC | GG | GG | CC | 9.28E-04 | 0.02597 | 0.9731 | Brown | BROWN |
| 113 | CT | GG | CC | GG | GG | CC | 0.09436  | 0.1479  | 0.7577 | Brown | BROWN |
| 114 | TT | GG | CC | GG | GG | CC | 0.09436  | 0.1479  | 0.7577 | Brown | BROWN |
| 115 | TT | GG | CC | GG | GG | CC | 0.09436  | 0.1479  | 0.7577 | Brown | BROWN |
| 116 | CT | GG | CC | GG | GG | CC | 0.09436  | 0.1479  | 0.7577 | Brown | BROWN |
| 117 | TT | GG | CC | GG | GG | CC | 9.28E-04 | 0.02597 | 0.9731 | Brown | BROWN |
| 118 | CT | GG | AA | GC | AA | CC | 0.1394   | 0.1183  | 0.7422 | Brown | BROWN |
| 119 | CC | GG | CA | CC | GG | CC | 0.4946   | 0.1254  | 0.38   | Blue  | INTER |
| 120 | CT | GG | CC | GG | GG | CC | 0.09436  | 0.1479  | 0.7577 | Brown | BROWN |
| 121 | TT | GG | CC | GG | GG | CC | 9.28E-04 | 0.02597 | 0.9731 | Brown | BRWON |
| 122 | TT | GG | CA | GG | GG | CC | 0.001567 | 0.02615 | 0.9723 | Brown | BROWN |
| 123 | TT | GG | CC | GG | GG | CC | 9.28E-04 | 0.02597 | 0.9731 | Brown | BROWN |

|     |    |    |    |    |    |    |          |         |         |       |       |
|-----|----|----|----|----|----|----|----------|---------|---------|-------|-------|
| 124 | TT | GG | CA | GG | GG | CC | 0.001567 | 0.02615 | 0.9723  | Brown | BROWN |
| 125 | TT | GG | CC | GG | GG | CC | 9.28E-04 | 0.02597 | 0.9731  | Brown | BROWN |
| 126 | TT | GG | CC | GG | GG | CC | 9.28E-04 | 0.02597 | 0.9731  | Brown | BROWN |
| 127 | TT | GG | CC | GG | GG | CC | 9.28E-04 | 0.02597 | 0.9731  | Brown | BROWN |
| 128 | TT | GG | CC | GG | GG | CC | 9.28E-04 | 0.02597 | 0.9731  | Brown | BROWN |
| 129 | CC | GG | CC | GG | GG | CC | 0.8702   | 0.07638 | 0.05347 | Blue  | BLUE  |
| 130 | TT | GG | CC | GG | GG | CC | 9.28E-04 | 0.02597 | 0.9731  | Brown | BROWN |
| 131 | CT | GG | CC | GG | GG | CC | 0.09436  | 0.1479  | 0.7577  | Brown | BROWN |
| 132 | TT | GG | CC | GG | GG | CC | 9.28E-04 | 0.02597 | 0.9731  | Brown | BROWN |
| 133 | CT | GG | CC | GG | GG | CC | 0.09436  | 0.1479  | 0.7577  | Brown | BROWN |
| 134 | CC | GG | CC | GG | GG | CC | 0.8702   | 0.07638 | 0.05347 | Blue  | BLUE  |
| 135 | CC | GG | CA | CC | GG | CC | 0.4946   | 0.1254  | 0.38    | Blue  | INTER |
| 136 | CT | GG | CC | GG | GG | CC | 0.09436  | 0.1479  | 0.7577  | Brown | Brown |
| 137 | CC | GG | CC | GG | GG | CC | 0.8702   | 0.07638 | 0.05347 | Blue  | BLUE  |
| 138 | CC | GG | CA | CC | GG | CC | 0.4946   | 0.1254  | 0.38    | Blue  | INTER |
| 139 | TT | GG | CC | GG | GG | CC | 9.28E-04 | 0.02597 | 0.9731  | Brown | BROWN |
| 140 | TT | GG | CC | GG | GG | CC | 9.28E-04 | 0.02597 | 0.9731  | Brown | BROWN |
| 141 | CT | GG | CC | GG | GG | CC | 0.09436  | 0.1479  | 0.7577  | Brown | BROWN |
| 142 | CT | GG | AA | GC | AA | CC | 0.001808 | 0.03577 | 0.9624  | Brown | BROWN |
| 143 | TT | GG | CC | GG | GG | CC | 9.28E-04 | 0.02597 | 0.9731  | Brown | BROWN |
| 144 | CT | GG | AA | GC | AA | CC | 0.001808 | 0.03577 | 0.9624  | Brown | BROWN |
| 145 | TT | GG | CC | GG | GG | CC | 9.28E-04 | 0.02597 | 0.9731  | Brown | BROWN |
| 146 | TT | GG | CC | GG | GG | CC | 9.28E-04 | 0.02597 | 0.9731  | Brown | BROWN |
| 147 | CT | GG | CC | GG | GG | CC | 0.09436  | 0.1479  | 0.7577  | Brown | BROWN |
| 148 | TT | GG | CC | GG | GG | CC | 9.28E-04 | 0.02597 | 0.9731  | Brown | BROWN |
| 149 | CC | GG | CC | GG | GG | CC | 0.870    | 0.07638 | 0.053   | Blue  | BLUE  |

|     |    |    |    |    |    |    |            |         |             |      |      |
|-----|----|----|----|----|----|----|------------|---------|-------------|------|------|
|     |    |    |    |    |    |    | 2          |         | 47          |      |      |
| 150 | CC | GG | CC | GG | GG | CC | 0.870<br>2 | 0.07638 | 0.053<br>47 | Blue | BLUE |
